# Supplementary material for: Southern Ocean CO2 outgassing and nutrient load reduced by a well-ventilated glacial North Pacific
Source: Research Square preprint supplement (doi:10.21203/rs.3.rs-5631992/v1), 2025-01-28
Supplement: Supplementary file 1 [file 07abf321950c3d8529393a3f.docx]

**Supporting Information for**

Southern Ocean CO2 outgassing and nutrient load reduced by a well-ventilated glacial North Pacific

Madison G. Shankle1*; Graeme A. MacGilchrist1; William R. Gray2; Casimir de Lavergne3; Laurie C. Menviel4; Andrea Burke1; James W. B. Rae1

1 School of Earth and Environmental Sciences, University of St Andrews, St Andrews, KY16 9TS, United Kingdom

2 Laboratoire des Sciences du Climat et de l’Environnement (LSCE/IPSL), CEA-CNRS-UVSQ, Université Paris-Saclay, Gif-sur-Yvette, 91191, France

3 LOCEAN Laboratory, Sorbonne Université-CNRS-IRD-MNHN, Paris, 75005, France

4 Climate Change Research Centre, The Australian Centre for Excellence in Antarctic Science, University of New South Wales, Sydney, NSW 2052, Australia

*Corresponding Author: Madison G. Shankle.

Email: mgs23@st-andrews.ac.uk

Address: School of Earth and Environmental Sciences, University of St Andrews, Bute Building, Queen’s Terrace, St Andrews, KY16 9TS, Scotland, United Kingdom

Phone number: +44 (0)1334 46 3940

Contents:

Supplementary Figure 1

Supplementary Figure 2

Supplementary Figure 3

Supplementary Figure 4

Supplementary Figure 5


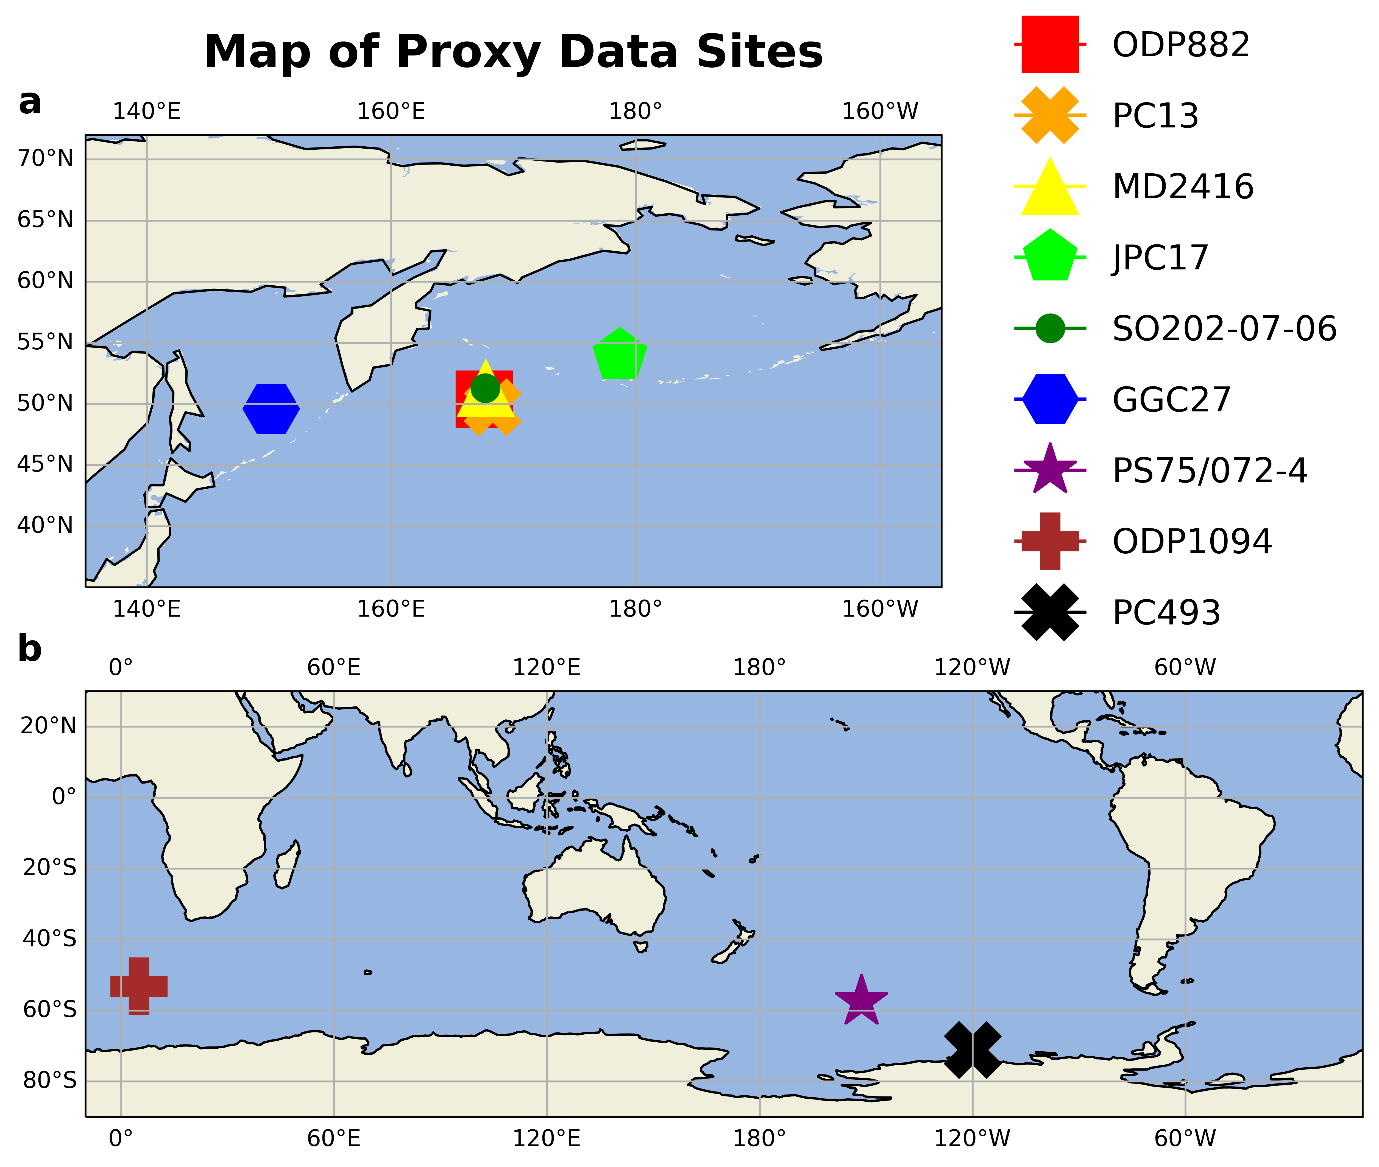


**Supplementary Figure 1. Maps depict the locations of marine sediment core sites providing the proxy data in Figure 2.** The proxy data presented in Figure 2 comes from a range of sites in the (a) North Pacific and (b) Southern Ocean.


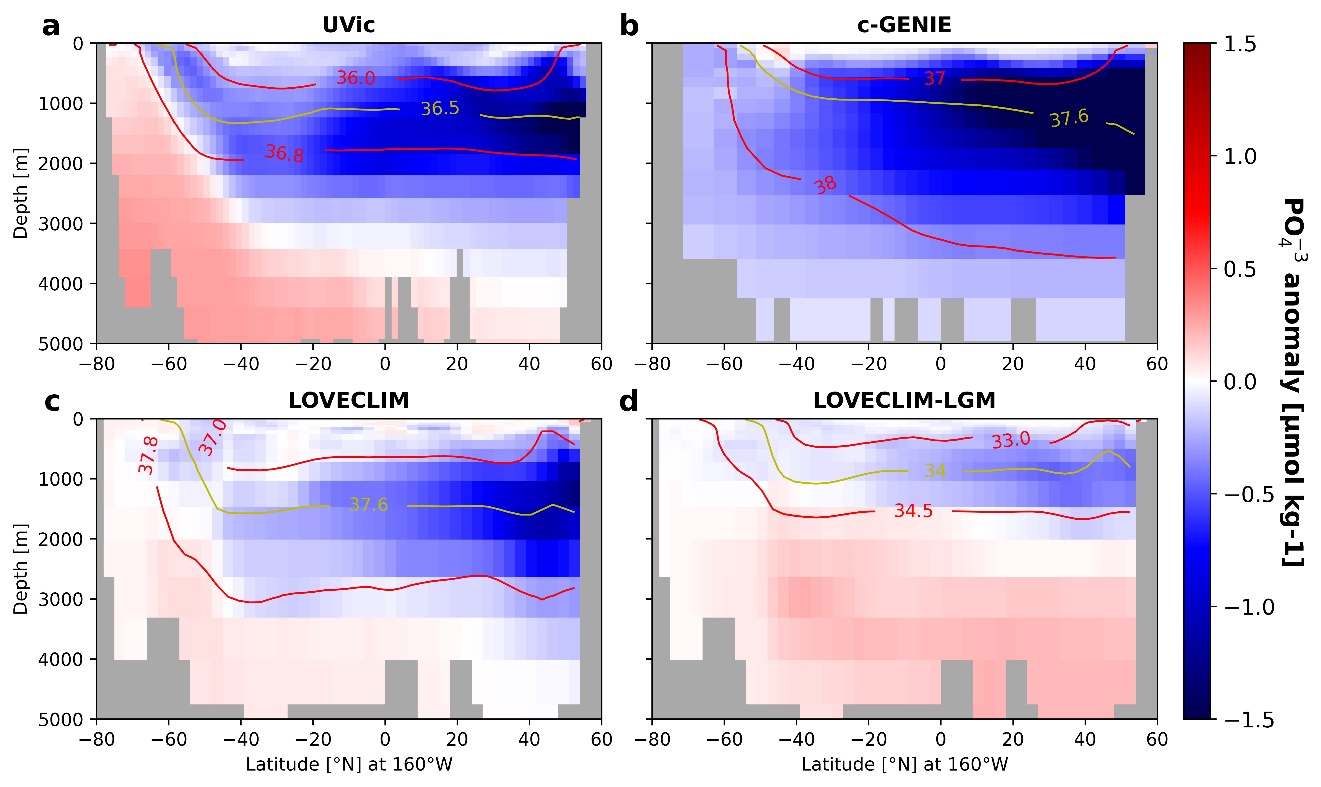


**Supplementary Figure 2. Earth system models simulating a well-ventilated glacial North Pacific show negative anomalies in phosphate (PO43-) (mmol kg-1) throughout the basin.** Phosphate anomalies along 160°W resulting from a well-ventilated glacial North Pacific show the same pattern as potential *p*CO2 (PCO2) anomalies depicted in Figure 3. Red and yellow contours show isolines of s2 (potential density referenced to 2000 dbar) from the perturbed simulation in each case, meant to approximate the neutral surfaces along which these waters are expected to flow.


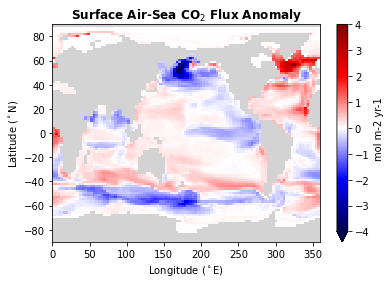


**Supplementary Figure 3. Air-sea CO2 flux exhibits negative anomalies across the Southern Ocean and North Pacific.** Air-sea CO2 flux anomaly (mol m-2 yr-1) between the control and perturbed simulations (UVic-NP – UVic-ctrl), with negative values indicating reduced CO2 outgassing or enhanced CO2 uptake. Note, we refrain from interpreting the increased outgassing observed in the North Atlantic due to freshwater forcing applied in this region, which likely induced non-analogous (to the LGM) changes in this region.


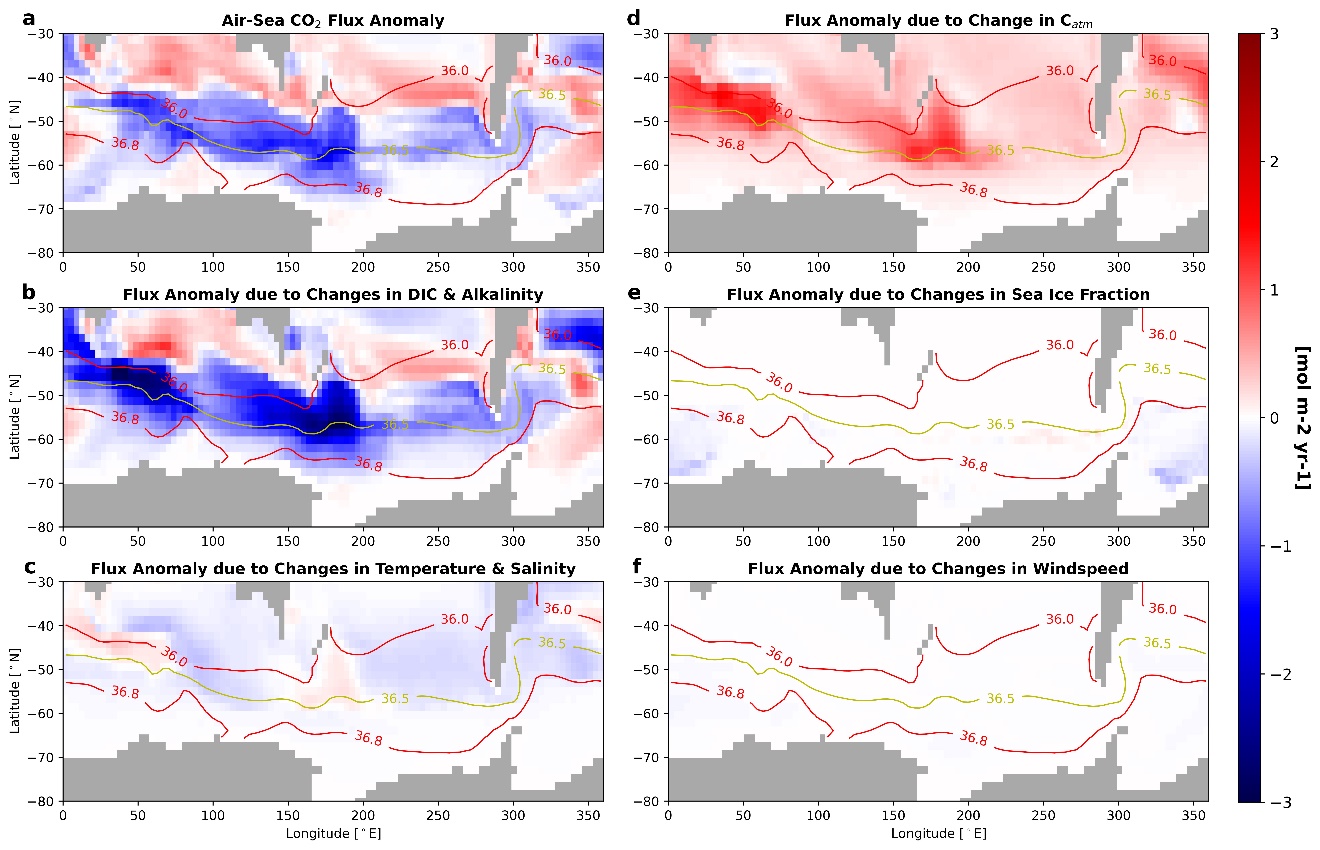


**Supplementary Figure 4. Southern Ocean air-sea CO2 flux anomaly is dominated by changes in the water’s alkalinity and dissolved inorganic carbon (DIC) content.** (a) Air-sea CO2 flux anomaly (mol m-2 yr-1) between the control and perturbed simulations (UVic-NP – UVic-ctrl), with negative values indicating reduced CO2 outgassing or enhanced CO2 uptake. (b-f) Air-sea CO2 flux anomaly attributable to changes in the stated variable (i.e., all other variables held constant at UVic-NP values, and flux anomaly is then calculated from changes in the stated variable between the UVic-ctrl and UVic-NP simulations, thus isolating the signal in outgassing anomaly due to the stated variable alone). Note that (d) depicts the CO2 flux anomaly due to changes both in atmospheric *p*CO2 and in CO2 solubility (a function of temperature and salinity changes between UVic-ctrl and UVic-NP); changes in atmospheric *p*CO2 dominate the positive-anomaly signal, though the isolated regions of greater anomalies are attributed to temperature changes. Changes in (e) fractional sea ice cover and (f) wind speed also play a negligible role in the reported CO2 flux anomaly (a). Red and yellow contours show isolines of s2 (potential density referenced to 2000 dbar) from the perturbed simulation (UVic-NP), meant to approximate the neutral surfaces along which these waters are expected to flow. s2 is plotted at 500m depth so as to avoid any influence of mixed layer processes.


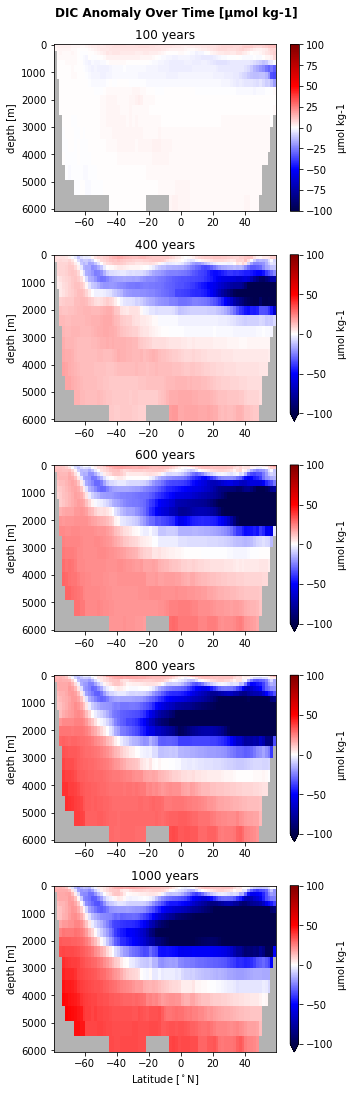


**Supplementary Figure 5. Dissolved inorganic carbon (DIC) accumulates in deep waters in UVic-NP over UVic-ctrl.** Dissolved inorganic carbon (DIC) anomaly (mmol kg-1) between the control and perturbed simulation (UVic-NP – UVic-ctrl) averaged over the Pacific basin (140-240°E) is plotted over the model’s evolution.
